# Supplementary material for: Deterministic Input, Noisy Mixed Modeling for Identifying Coexisting Condensation Rules in Cognitive Diagnostic Assessments
Source: MDPI journal article supplement (doi:10.3390/jintelligence11030055), 2023-03-16
Supplement: s1 [file s1]

## Supplementary

### Section S1. The relationship between DINMix model and GDINA model

To understand the relationship between DINMix model and GDINA model, for simplicity, let us take an item with two required attributes as an example (i.e.,  $\mathbf{q}_i = (1, 1)$ ). In such case, the GDINA model can be expressed as

$$P(y_{ni} = 1 | \boldsymbol{\delta}_i, \boldsymbol{\alpha}_{nk}) = \delta_{i0} + \delta_{i1}\alpha_{n1} + \delta_{i2}\alpha_{n2} + \delta_{i12}\alpha_{n1}\alpha_{n2}, \quad (S1)$$

where  $\delta_{i0}$  is the intercept for item  $i$ ;  $\delta_{i1}$  and  $\delta_{i2}$  are the main effect due to  $\alpha_1$  and  $\alpha_2$ , respectively;  $\delta_{i12}$  is the interaction effect due  $\alpha_1$  and  $\alpha_2$ . In contrast, for the same item, the DINMix model can be expressed as

$$\begin{aligned} P(y_{ni} = 1 | g_i, s_i, \boldsymbol{\tau}_i, \boldsymbol{\alpha}_{nk}) &= g_i + (1 - s_i - g_i) \left( \tau_{i1}\alpha_{n1}\alpha_{n2} + \tau_{i2}(1 - (1 - \alpha_{n1})(1 - \alpha_{n2})) + \tau_{i3} \frac{\alpha_{n1} + \alpha_{n2}}{2} \right) \\ &= g_i + (1 - s_i - g_i) \left( \tau_{i1}\alpha_{n1}\alpha_{n2} + \tau_{i2}\alpha_{n1} + \tau_{i2}\alpha_{n2} - \tau_{i2}\alpha_{n1}\alpha_{n2} + (1 - \tau_{i1} - \tau_{i2}) \frac{(\alpha_{n1} + \alpha_{n2})}{2} \right) \\ &= g_i + (1 - s_i - g_i) \left( \frac{(1 - \tau_{i1} + \tau_{i2})}{2} \alpha_{n1} + \frac{(1 - \tau_{i1} + \tau_{i2})}{2} \alpha_{n2} + (\tau_{i1} - \tau_{i2}) \alpha_{n1}\alpha_{n2} \right) \\ &= g_i + \frac{(1 - s_i - g_i)(1 - \tau_{i1} + \tau_{i2})}{2} \alpha_{n1} + \frac{(1 - s_i - g_i)(1 - \tau_{i1} + \tau_{i2})}{2} \alpha_{n2} + (1 - s_i - g_i)(\tau_{i1} - \tau_{i2}) \alpha_{n1}\alpha_{n2} \end{aligned} \quad (S2)$$

Comparing equations (S1) and (S2), it can be found that the DINMix model is equal to the GDINA model by setting intercept parameter

$$\delta_{i0} \equiv g_i, \quad \text{main effect} \quad \delta_{i1} = \delta_{i2} \equiv \frac{(1 - s_i - g_i)(1 - \tau_{i1} + \tau_{i2})}{2}, \quad \text{and two-way interaction effect}$$

$$\delta_{i12} \equiv (1 - s_i - g_i)(\tau_{i1} - \tau_{i2}).$$

We can also observe the difference between above two models (S1 and S2) in how they are constrained as reduced models. For the GDINA model, it has

$$P(y_{ni} = 1 | \boldsymbol{\delta}_i, \boldsymbol{\alpha}_{nk}) = \begin{cases} DINA : & \delta_{i0} + \delta_{i12}\alpha_{n1}\alpha_{n2} & \text{if } \delta_{i1} = \delta_{i2} = 0 \\ DINO : & \delta_{i0} + \delta_{i1}\alpha_{n1} + \delta_{i2}\alpha_{n2} - \delta_{i12}\alpha_{n1}\alpha_{n2} & \text{if } \delta_{i1} = \delta_{i2} = -\delta_{i12} \\ ACDM : & \delta_{i0} + \delta_{i1}\alpha_{n1} + \delta_{i2}\alpha_{n2} & \text{if } \delta_{i12} = 0 \end{cases} \quad (S3)$$

By contrast, for the DINMix model, it has

$$P(y_{ni} = 1 | g_i, s_i, \boldsymbol{\tau}_i, \boldsymbol{\alpha}_{nk}) = \begin{cases} DINA : & g_i + (1 - s_i - g_i)(\alpha_{n1}\alpha_{n2}) & \text{if } \tau_{i1} = 1 \\ DINO : & g_i + (1 - s_i - g_i)(\alpha_{n1} + \alpha_{n2} - \alpha_{n1}\alpha_{n2}) & \text{if } \tau_{i2} = 1 \\ DINR : & g_i + (1 - s_i - g_i)(\alpha_{n1}/2 + \alpha_{n2}/2) & \text{if } \tau_{i3} = 1 \end{cases} \quad (S4)$$

It can be found that (a) the GDINA model achieves reduction by directly constraining the item parameters, while the DINMix model achieves reduction by constraining the item-level mixing proportions parameters; that (b) when the two models are constrained to the DINA and DINO models, there is no essential difference between them; and that (c) the main difference between them is reflected in the reduced models that satisfy the compensatory condensation rule.

Further, with the increase of attributes required by the item, the generalized relationship between the GDINA model and the DINMix model can be expressed as

Intercept :  $\delta_{i0} \equiv g_i$ ,

$$\text{Main effect : } \delta_{ik} \equiv (1 - s_i - g_i) \frac{1 - \tau_{i1} + (K_i^* - 1)\tau_{i2}}{K_i^*}, \quad (S5)$$

$$x\text{-way interaction effect : } \delta_{i(x)} \equiv (1 - s_i - g_i)(\tau_{i1}I(x = K_i^*) + \tau_{i2}(-1)^{K_i^*+1}),$$

where  $K_i^* = \sum_{k=1}^K q_{ik}$  is the number of required attributes of item  $i$ ;  $I(\cdot)$  is an identification function.

Overall, the DINMix model can be seen as a constraint model from the GDINA model by fixing some parameters (e.g., main effects) of the latter to be equal.

**Table S1.** Summary of the Recovery of Attributes in Simulation Study 1.

| LSM | IQ     | N    | I  | TM      | ACCR       |            |            |            |            | PCCR  |
|-----|--------|------|----|---------|------------|------------|------------|------------|------------|-------|
|     |        |      |    |         | $\alpha_1$ | $\alpha_2$ | $\alpha_3$ | $\alpha_4$ | $\alpha_5$ |       |
| Un  | Higher | 500  | 15 | Uniform | 0.891      | 0.876      | 0.880      | 0.882      | 0.881      | 0.541 |
|     |        |      |    | Skew    | 0.887      | 0.871      | 0.890      | 0.888      | 0.881      | 0.548 |
|     |        |      | 30 | Uniform | 0.958      | 0.956      | 0.957      | 0.955      | 0.956      | 0.807 |
|     |        |      |    | Skew    | 0.961      | 0.958      | 0.957      | 0.965      | 0.959      | 0.822 |
|     |        | 1000 | 15 | Uniform | 0.879      | 0.881      | 0.883      | 0.886      | 0.887      | 0.546 |
|     |        |      |    | Skew    | 0.878      | 0.875      | 0.886      | 0.889      | 0.892      | 0.552 |
|     |        |      | 30 | Uniform | 0.956      | 0.959      | 0.955      | 0.955      | 0.958      | 0.807 |
|     |        |      |    | Skew    | 0.959      | 0.960      | 0.960      | 0.962      | 0.960      | 0.822 |
|     | Lower  | 500  | 15 | Uniform | 0.790      | 0.763      | 0.781      | 0.782      | 0.772      | 0.290 |
|     |        |      |    | Skew    | 0.775      | 0.796      | 0.788      | 0.777      | 0.773      | 0.299 |
|     |        |      | 30 | Uniform | 0.858      | 0.866      | 0.866      | 0.870      | 0.883      | 0.488 |
|     |        |      |    | Skew    | 0.861      | 0.861      | 0.869      | 0.852      | 0.869      | 0.503 |
|     |        | 1000 | 15 | Uniform | 0.786      | 0.779      | 0.792      | 0.784      | 0.785      | 0.303 |
|     |        |      |    | Skew    | 0.794      | 0.796      | 0.792      | 0.790      | 0.786      | 0.317 |
|     |        |      | 30 | Uniform | 0.871      | 0.861      | 0.870      | 0.863      | 0.862      | 0.500 |
|     |        |      |    | Skew    | 0.886      | 0.878      | 0.873      | 0.885      | 0.873      | 0.536 |
| MVN | Higher | 500  | 15 | Uniform | 0.922      | 0.921      | 0.913      | 0.913      | 0.922      | 0.673 |
|     |        |      |    | Skew    | 0.918      | 0.919      | 0.912      | 0.920      | 0.923      | 0.671 |
|     |        |      | 30 | Uniform | 0.971      | 0.969      | 0.972      | 0.971      | 0.972      | 0.867 |
|     |        |      |    | Skew    | 0.972      | 0.972      | 0.972      | 0.973      | 0.969      | 0.870 |
|     |        | 1000 | 15 | Uniform | 0.920      | 0.918      | 0.920      | 0.920      | 0.916      | 0.672 |
|     |        |      |    | Skew    | 0.923      | 0.918      | 0.922      | 0.928      | 0.926      | 0.690 |
|     |        |      | 30 | Uniform | 0.972      | 0.971      | 0.968      | 0.973      | 0.973      | 0.870 |
|     |        |      |    | Skew    | 0.972      | 0.976      | 0.972      | 0.969      | 0.970      | 0.871 |
|     | Lower  | 500  | 15 | Uniform | 0.849      | 0.834      | 0.840      | 0.836      | 0.845      | 0.462 |
|     |        |      |    | Skew    | 0.848      | 0.846      | 0.848      | 0.848      | 0.855      | 0.482 |
|     |        |      | 30 | Uniform | 0.910      | 0.907      | 0.909      | 0.905      | 0.913      | 0.641 |
|     |        |      |    | Skew    | 0.914      | 0.914      | 0.903      | 0.909      | 0.900      | 0.636 |
|     |        | 1000 | 15 | Uniform | 0.854      | 0.844      | 0.837      | 0.840      | 0.835      | 0.473 |
|     |        |      |    | Skew    | 0.847      | 0.852      | 0.849      | 0.836      | 0.839      | 0.477 |
|     |        |      | 30 | Uniform | 0.907      | 0.906      | 0.913      | 0.913      | 0.912      | 0.646 |

|  |      |       |       |       |       |       |       |
|--|------|-------|-------|-------|-------|-------|-------|
|  | Skew | 0.914 | 0.916 | 0.919 | 0.915 | 0.918 | 0.664 |
|--|------|-------|-------|-------|-------|-------|-------|

*Note*, LSM = latent structural model; IQ = item quality; N = sample size; I = test length; TM = type of item-level mixing proportion; Un = unstructured LSM; MVN = multivariate normal distribution; ACCR = attribute correct classification rate; PCCR = pattern correct classification rate.

**Table S2.** Summary of the Recovery of Attributes in Simulation Study 2

| Test Situation | Analysis Model | ACCR       |            |            |            |            | PCCR  |
|----------------|----------------|------------|------------|------------|------------|------------|-------|
|                |                | $\alpha_1$ | $\alpha_2$ | $\alpha_3$ | $\alpha_4$ | $\alpha_5$ |       |
| Conjunctive    | DINA           | 0.961      | 0.958      | 0.942      | 0.960      | 0.958      | 0.805 |
|                | DINMix         | 0.960      | 0.958      | 0.941      | 0.960      | 0.958      | 0.804 |
| Disjunctive    | DINO           | 0.960      | 0.960      | 0.941      | 0.959      | 0.957      | 0.806 |
|                | DINMix         | 0.959      | 0.959      | 0.941      | 0.958      | 0.957      | 0.803 |
| Ratio          | DINR           | 0.971      | 0.970      | 0.956      | 0.969      | 0.970      | 0.853 |
|                | DINMix         | 0.971      | 0.970      | 0.955      | 0.968      | 0.969      | 0.852 |
| Compensatory   | ACDM           | 0.981      | 0.966      | 0.956      | 0.976      | 0.956      | 0.853 |
|                | DINMix         | 0.979      | 0.962      | 0.955      | 0.973      | 0.954      | 0.844 |
| Fuzzily        | GDINA          | 0.975      | 0.965      | 0.954      | 0.970      | 0.962      | 0.845 |
|                | DINMix         | 0.973      | 0.964      | 0.952      | 0.970      | 0.961      | 0.840 |
| Separately     | DINA           | 0.949      | 0.946      | 0.927      | 0.949      | 0.941      | 0.746 |
|                | DINO           | 0.947      | 0.939      | 0.923      | 0.945      | 0.935      | 0.726 |
|                | DINR           | 0.969      | 0.964      | 0.950      | 0.966      | 0.960      | 0.827 |
|                | ACDM           | 0.969      | 0.964      | 0.949      | 0.968      | 0.960      | 0.828 |
|                | GDINA          | 0.982      | 0.981      | 0.965      | 0.981      | 0.979      | 0.900 |
|                | DINMix         | 0.981      | 0.980      | 0.965      | 0.980      | 0.979      | 0.899 |

*Note*, ACCR = attribute correct classification rate; PCCR = attribute pattern correct classification rate; DINA = deterministic input, noisy "and" gate model; DINO = deterministic input, noisy "or" gate model; DINR = deterministic input, noisy ratio model; ACDM = additive cognitive diagnosis model; GDINA = generalized DINA model; DINMix = deterministic input, noisy mixed model.

**Table S3.** Summary of the Recovery of Item Parameters in Test Situation (f) in Simulation Study 2.

| Item | DINA    |       |        |       | DINO    |       |        |       | DINR    |       |        |       | ACDM       |       |            |       | GDINA      |       |            |       | DINMix  |       |        |       |
|------|---------|-------|--------|-------|---------|-------|--------|-------|---------|-------|--------|-------|------------|-------|------------|-------|------------|-------|------------|-------|---------|-------|--------|-------|
|      | $g_i^i$ |       | $s_i$  |       | $g_i^i$ |       | $s_i$  |       | $g_i^i$ |       | $s_i$  |       | $g_i^{i*}$ |       | $s_i^{i*}$ |       | $g_i^{i*}$ |       | $s_i^{i*}$ |       | $g_i^i$ |       | $s_i$  |       |
|      | Bias    | RMSE  | Bias   | RMSE  | Bias    | RMSE  | Bias   | RMSE  | Bias    | RMSE  | Bias   | RMSE  | Bias       | RMSE  | Bias       | RMSE  | Bias       | RMSE  | Bias       | RMSE  | Bias    | RMSE  | Bias   | RMSE  |
| 1    | -0.009  | 0.021 | 0.018  | 0.026 | 0.015   | 0.023 | -0.015 | 0.025 | 0.000   | 0.015 | -0.002 | 0.017 | 0.001      | 0.015 | -0.003     | 0.017 | -0.001     | 0.014 | 0.001      | 0.016 | -0.001  | 0.014 | 0.001  | 0.016 |
| 2    | -0.016  | 0.023 | 0.021  | 0.027 | 0.032   | 0.039 | -0.021 | 0.025 | 0.002   | 0.016 | -0.002 | 0.016 | 0.001      | 0.016 | -0.003     | 0.016 | 0.001      | 0.016 | -0.001     | 0.012 | 0.001   | 0.015 | 0.000  | 0.013 |
| 3    | -0.014  | 0.024 | 0.028  | 0.035 | 0.029   | 0.038 | -0.024 | 0.029 | 0.006   | 0.019 | 0.000  | 0.016 | 0.006      | 0.020 | -0.002     | 0.016 | 0.001      | 0.015 | 0.002      | 0.014 | 0.001   | 0.015 | 0.003  | 0.014 |
| 4    | -0.007  | 0.015 | 0.012  | 0.026 | 0.023   | 0.029 | -0.014 | 0.024 | 0.003   | 0.014 | -0.003 | 0.020 | 0.003      | 0.015 | -0.004     | 0.020 | 0.001      | 0.013 | -0.001     | 0.018 | 0.001   | 0.013 | 0.000  | 0.018 |
| 5    | -0.017  | 0.022 | 0.022  | 0.028 | 0.045   | 0.049 | -0.027 | 0.033 | 0.007   | 0.017 | -0.005 | 0.018 | 0.004      | 0.016 | -0.007     | 0.018 | 0.001      | 0.012 | -0.005     | 0.017 | 0.002   | 0.013 | -0.003 | 0.016 |
| 6    | -0.013  | 0.017 | 0.010  | 0.022 | 0.019   | 0.026 | -0.015 | 0.020 | 0.000   | 0.013 | -0.007 | 0.016 | 0.001      | 0.013 | -0.007     | 0.016 | 0.000      | 0.011 | -0.003     | 0.015 | -0.001  | 0.011 | -0.003 | 0.015 |
| 7    | -0.019  | 0.027 | 0.026  | 0.033 | 0.025   | 0.036 | -0.021 | 0.027 | -0.001  | 0.021 | 0.002  | 0.018 | -0.003     | 0.021 | 0.000      | 0.017 | -0.005     | 0.018 | 0.000      | 0.014 | -0.004  | 0.019 | 0.001  | 0.014 |
| 8    | -0.026  | 0.034 | 0.025  | 0.031 | 0.026   | 0.031 | -0.019 | 0.030 | -0.001  | 0.016 | 0.000  | 0.020 | -0.001     | 0.015 | -0.002     | 0.020 | -0.005     | 0.015 | 0.003      | 0.015 | -0.006  | 0.014 | 0.004  | 0.015 |
| 9    | -0.005  | 0.018 | 0.018  | 0.026 | 0.023   | 0.031 | -0.010 | 0.021 | 0.004   | 0.017 | 0.003  | 0.018 | 0.005      | 0.017 | 0.002      | 0.018 | 0.002      | 0.016 | 0.004      | 0.017 | 0.002   | 0.016 | 0.005  | 0.018 |
| 10   | -0.014  | 0.020 | 0.025  | 0.033 | 0.043   | 0.047 | -0.028 | 0.034 | 0.010   | 0.018 | -0.001 | 0.019 | 0.007      | 0.017 | -0.003     | 0.019 | 0.006      | 0.015 | 0.001      | 0.016 | 0.007   | 0.015 | 0.002  | 0.016 |
| 11   | -0.007  | 0.015 | 0.048  | 0.055 | -0.007  | 0.019 | 0.533  | 0.533 | -0.056  | 0.057 | 0.281  | 0.282 | -0.056     | 0.057 | 0.277      | 0.278 | -0.017     | 0.021 | 0.001      | 0.022 | -0.018  | 0.022 | 0.005  | 0.023 |
| 12   | -0.004  | 0.012 | 0.054  | 0.063 | -0.006  | 0.022 | 0.529  | 0.529 | -0.054  | 0.055 | 0.280  | 0.281 | -0.055     | 0.056 | 0.276      | 0.277 | -0.016     | 0.022 | 0.003      | 0.022 | -0.016  | 0.022 | 0.007  | 0.024 |
| 13   | -0.003  | 0.010 | 0.082  | 0.094 | -0.004  | 0.025 | 0.694  | 0.694 | -0.065  | 0.066 | 0.533  | 0.534 | -0.065     | 0.065 | 0.528      | 0.528 | -0.028     | 0.032 | 0.006      | 0.031 | -0.026  | 0.030 | 0.016  | 0.036 |
| 14   | -0.005  | 0.012 | 0.088  | 0.098 | -0.003  | 0.020 | 0.695  | 0.695 | -0.066  | 0.066 | 0.535  | 0.536 | -0.066     | 0.066 | 0.530      | 0.531 | -0.030     | 0.032 | 0.005      | 0.024 | -0.027  | 0.029 | 0.018  | 0.031 |
| 15   | 0.530   | 0.530 | -0.005 | 0.019 | 0.053   | 0.060 | -0.007 | 0.014 | 0.278   | 0.279 | -0.055 | 0.056 | 0.277      | 0.278 | -0.055     | 0.056 | -0.003     | 0.020 | 0.000      | 0.019 | -0.001  | 0.020 | -0.016 | 0.020 |
| 16   | 0.534   | 0.534 | -0.009 | 0.018 | 0.072   | 0.076 | -0.010 | 0.015 | 0.289   | 0.290 | -0.057 | 0.058 | 0.288      | 0.289 | -0.057     | 0.058 | 0.000      | 0.017 | -0.002     | 0.018 | 0.004   | 0.018 | -0.019 | 0.022 |
| 17   | 0.692   | 0.692 | 0.008  | 0.026 | 0.119   | 0.131 | -0.001 | 0.008 | 0.533   | 0.534 | -0.061 | 0.062 | 0.530      | 0.531 | -0.061     | 0.062 | 0.012      | 0.035 | 0.014      | 0.030 | 0.018   | 0.040 | -0.020 | 0.023 |
| 18   | 0.695   | 0.695 | -0.003 | 0.024 | 0.120   | 0.131 | -0.003 | 0.010 | 0.538   | 0.539 | -0.064 | 0.065 | 0.536      | 0.536 | -0.064     | 0.065 | 0.006      | 0.039 | 0.001      | 0.028 | 0.012   | 0.041 | -0.026 | 0.029 |
| 19   | 0.254   | 0.255 | 0.009  | 0.022 | 0.004   | 0.020 | 0.259  | 0.260 | -0.005  | 0.018 | 0.000  | 0.015 | -0.007     | 0.019 | -0.003     | 0.015 | -0.008     | 0.020 | -0.002     | 0.019 | -0.006  | 0.020 | 0.001  | 0.019 |
| 20   | 0.256   | 0.257 | 0.009  | 0.025 | 0.015   | 0.022 | 0.256  | 0.257 | 0.004   | 0.017 | 0.002  | 0.019 | 0.002      | 0.017 | -0.001     | 0.019 | -0.001     | 0.016 | -0.001     | 0.021 | 0.001   | 0.016 | 0.002  | 0.021 |
| 21   | 0.335   | 0.336 | 0.013  | 0.033 | 0.009   | 0.033 | 0.343  | 0.343 | 0.003   | 0.022 | 0.011  | 0.025 | 0.000      | 0.022 | 0.006      | 0.023 | 0.002      | 0.032 | 0.006      | 0.032 | -0.004  | 0.026 | 0.003  | 0.026 |
| 22   | 0.345   | 0.346 | 0.010  | 0.030 | 0.012   | 0.034 | 0.333  | 0.333 | 0.010   | 0.026 | 0.001  | 0.023 | 0.006      | 0.025 | -0.004     | 0.024 | 0.001      | 0.028 | 0.001      | 0.028 | -0.002  | 0.025 | -0.002 | 0.024 |
| 23   | 0.264   | 0.264 | 0.008  | 0.024 | 0.016   | 0.029 | 0.253  | 0.254 | 0.011   | 0.022 | 0.002  | 0.022 | 0.010      | 0.021 | 0.000      | 0.023 | 0.006      | 0.025 | -0.001     | 0.021 | 0.007   | 0.025 | 0.002  | 0.022 |
| 24   | 0.257   | 0.258 | 0.006  | 0.022 | 0.012   | 0.021 | 0.253  | 0.253 | 0.004   | 0.017 | -0.001 | 0.021 | 0.003      | 0.016 | -0.004     | 0.021 | -0.001     | 0.016 | -0.003     | 0.021 | 0.000   | 0.016 | 0.000  | 0.021 |
| 25   | 0.346   | 0.346 | 0.011  | 0.032 | 0.008   | 0.038 | 0.331  | 0.332 | 0.009   | 0.030 | 0.003  | 0.025 | 0.005      | 0.029 | -0.003     | 0.025 | 0.000      | 0.035 | 0.005      | 0.029 | -0.003  | 0.031 | 0.001  | 0.024 |
| 26   | 0.338   | 0.339 | 0.005  | 0.031 | 0.013   | 0.030 | 0.339  | 0.340 | 0.009   | 0.024 | 0.008  | 0.033 | 0.006      | 0.023 | 0.002      | 0.031 | 0.002      | 0.025 | -0.002     | 0.030 | -0.001  | 0.023 | -0.002 | 0.028 |
| 27   | 0.191   | 0.192 | 0.010  | 0.020 | 0.005   | 0.020 | 0.323  | 0.324 | -0.024  | 0.028 | 0.038  | 0.043 | -0.025     | 0.028 | 0.034      | 0.040 | -0.001     | 0.019 | -0.006     | 0.016 | 0.000   | 0.019 | -0.002 | 0.015 |
| 28   | 0.191   | 0.192 | 0.019  | 0.031 | 0.010   | 0.024 | 0.324  | 0.324 | -0.021  | 0.027 | 0.045  | 0.053 | -0.023     | 0.028 | 0.041      | 0.050 | 0.002      | 0.023 | 0.004      | 0.025 | 0.002   | 0.023 | 0.007  | 0.026 |
| 29   | 0.171   | 0.172 | 0.032  | 0.046 | 0.011   | 0.030 | 0.512  | 0.512 | -0.046  | 0.049 | 0.223  | 0.225 | -0.047     | 0.050 | 0.217      | 0.220 | 0.002      | 0.023 | 0.007      | 0.031 | -0.010  | 0.025 | 0.015  | 0.035 |
| 30   | 0.166   | 0.166 | 0.035  | 0.046 | 0.002   | 0.029 | 0.515  | 0.516 | -0.050  | 0.052 | 0.226  | 0.228 | -0.051     | 0.053 | 0.221      | 0.223 | -0.005     | 0.024 | 0.011      | 0.032 | -0.016  | 0.027 | 0.019  | 0.036 |

Note, RMSE = root mean square error; DINA = deterministic input, noisy "and" gate model; DINO = deterministic input, noisy "or" gate model; DINR = deterministic input, noisy ratio model; ACDM = additive cognitive diagnosis model; GDINA = generalized DINA model; DINMix = deterministic input, noisy mixed model; \* = converted from the intercept and interaction parameters.

**Table S4.** Summary of the Item-Level –2LCPO of Six Models in Test Situation (f) in Simulation Study 2.

| Analysis Model | Item    |        |        |         |         |         |         |         |         |         |         |         |         |         |         |
|----------------|---------|--------|--------|---------|---------|---------|---------|---------|---------|---------|---------|---------|---------|---------|---------|
|                | 1       | 2      | 3      | 4       | 5       | 6       | 7       | 8       | 9       | 10      | 11      | 12      | 13      | 14      | 15      |
| DINA           | 831.51  | 838.41 | 891.39 | 834.05  | 850.32  | 818.44  | 839.22  | 880.38  | 841.69  | 856.22  | 746.00  | 759.65  | 721.53  | 718.01  | 1138.96 |
| DINO           | 830.28  | 857.40 | 894.42 | 856.65  | 875.88  | 834.07  | 850.51  | 896.67  | 859.90  | 876.99  | 1129.66 | 1133.25 | 964.80  | 962.95  | 764.62  |
| DINR           | 782.30  | 804.13 | 874.24 | 800.70  | 822.72  | 775.61  | 805.32  | 867.66  | 808.16  | 829.94  | 942.63  | 951.03  | 880.41  | 875.65  | 951.07  |
| ACDM           | 781.09  | 801.85 | 874.71 | 798.89  | 819.73  | 774.19  | 802.46  | 868.94  | 808.29  | 826.90  | 943.71  | 951.23  | 881.80  | 877.52  | 951.90  |
| GDINA          | 725.23  | 736.61 | 803.57 | 734.39  | 741.20  | 719.46  | 726.38  | 797.28  | 745.34  | 756.61  | 712.11  | 724.98  | 697.68  | 692.17  | 725.64  |
| DINMix         | 726.98  | 736.95 | 803.67 | 735.62  | 742.06  | 721.02  | 728.16  | 795.52  | 746.05  | 757.47  | 712.77  | 725.98  | 694.83  | 688.82  | 726.49  |
| Analysis Model | Item    |        |        |         |         |         |         |         |         |         |         |         |         |         |         |
|                | 16      | 17     | 18     | 19      | 20      | 21      | 22      | 23      | 24      | 25      | 26      | 27      | 28      | 29      | 30      |
| DINA           | 1129.30 | 975.34 | 961.75 | 1165.14 | 1163.37 | 1294.37 | 1296.91 | 1169.82 | 1162.73 | 1297.93 | 1291.78 | 1104.23 | 1112.52 | 1143.12 | 1137.01 |
| DINO           | 775.02  | 754.55 | 746.42 | 1164.34 | 1173.74 | 1294.61 | 1294.91 | 1170.21 | 1168.27 | 1289.80 | 1298.39 | 1196.22 | 1202.77 | 1252.74 | 1246.85 |
| DINR           | 948.63  | 893.32 | 880.20 | 1061.81 | 1073.24 | 1197.76 | 1197.71 | 1076.08 | 1070.97 | 1197.54 | 1202.71 | 1056.44 | 1069.52 | 1140.87 | 1134.20 |
| ACDM           | 949.39  | 895.05 | 881.94 | 1061.96 | 1073.24 | 1200.19 | 1200.23 | 1058.81 | 1054.68 | 1186.78 | 1190.78 | 1053.83 | 1066.36 | 1141.58 | 1133.74 |
| GDINA          | 728.51  | 721.54 | 710.07 | 1043.91 | 1053.63 | 1189.85 | 1190.30 | 1039.27 | 1034.12 | 1176.39 | 1178.90 | 1023.28 | 1037.89 | 1091.46 | 1084.07 |
| DINMix         | 729.11  | 717.93 | 706.95 | 1042.95 | 1052.90 | 1185.86 | 1185.33 | 1057.75 | 1051.48 | 1185.97 | 1189.57 | 1026.19 | 1040.02 | 1095.02 | 1088.43 |

**Table S5.** The Estimated Item Parameters for the Fraction Subtraction Data (Posterior Mean).

| Item | DINA  |       | DINO  |       | DINR  |       | ACDM    |         | GDINA   |         | Wald-selected |        | DINMix |       |             |             |             |
|------|-------|-------|-------|-------|-------|-------|---------|---------|---------|---------|---------------|--------|--------|-------|-------------|-------------|-------------|
|      | $g_i$ | $s_i$ | $g_i$ | $s_i$ | $g_i$ | $s_i$ | $g_i^*$ | $s_i^*$ | $g_i^*$ | $s_i^*$ | $g_i$         | $s_i$  | $g_i$  | $s_i$ | $\tau_{i1}$ | $\tau_{i2}$ | $\tau_{i3}$ |
| 1    | 0.044 | 0.077 | 0.030 | 0.117 | 0.010 | 0.012 | 0.010   | 0.061   | 0.008   | 0.049   | 0.017*        | 0.099* | 0.018  | 0.070 | 0.850       | 0.037       | 0.114       |
| 2    | 0.024 | 0.040 | 0.053 | 0.031 | 0.031 | 0.007 | 0.020   | 0.024   | 0.015   | 0.016   | 0.050         | 0.037  | 0.019  | 0.031 | 0.895       | 0.037       | 0.068       |
| 3    | 0.007 | 0.133 | 0.011 | 0.107 | 0.005 | 0.053 | 0.005   | 0.101   | 0.005   | 0.080   | 0.010         | 0.114  | 0.007  | 0.108 | 0.958       | 0.014       | 0.028       |
| 4    | 0.237 | 0.110 | 0.212 | 0.129 | 0.180 | 0.038 | 0.023   | 0.012   | 0.050   | 0.068   | 0.041*        | 0.113* | 0.162  | 0.110 | 0.819       | 0.073       | 0.108       |
| 5    | 0.309 | 0.152 | 0.297 | 0.230 | 0.269 | 0.076 | 0.052   | 0.031   | 0.183   | 0.094   | 0.333         | 0.117  | 0.161  | 0.121 | 0.609       | 0.183       | 0.208       |
| 6    | 0.199 | 0.038 | 0.677 | 0.007 | 0.566 | 0.016 | 0.325   | 0.028   | 0.503   | 0.033   | 0.270         | 0.035  | 0.336  | 0.033 | 1           | 0           | 0           |
| 7    | 0.035 | 0.201 | 0.017 | 0.250 | 0.007 | 0.100 | 0.011   | 0.130   | 0.008   | 0.065   | 0.041         | 0.184  | 0.012  | 0.172 | 0.896       | 0.034       | 0.070       |
| 8    | 0.433 | 0.164 | 0.618 | 0.034 | 0.526 | 0.068 | 0.474   | 0.149   | 0.499   | 0.095   | 0.446         | 0.153  | 0.443  | 0.137 | 1           | 0           | 0           |
| 9    | 0.236 | 0.248 | 0.532 | 0.044 | 0.504 | 0.159 | 0.522   | 0.203   | 0.402   | 0.136   | 0.294         | 0.233  | 0.345  | 0.230 | 1           | 0           | 0           |
| 10   | 0.036 | 0.191 | 0.016 | 0.246 | 0.006 | 0.128 | 0.009   | 0.158   | 0.018   | 0.104   | 0.035         | 0.143  | 0.013  | 0.150 | 0.924       | 0.024       | 0.053       |
| 11   | 0.068 | 0.084 | 0.072 | 0.075 | 0.056 | 0.026 | 0.036   | 0.027   | 0.044   | 0.035   | 0.067         | 0.082  | 0.032  | 0.075 | 0.908       | 0.037       | 0.055       |
| 12   | 0.267 | 0.038 | 0.540 | 0.038 | 0.459 | 0.009 | 0.183   | 0.043   | 0.069   | 0.050   | 0.057*        | 0.043* | 0.035  | 0.041 | 0.153       | 0.551       | 0.296       |
| 13   | 0.017 | 0.335 | 0.005 | 0.528 | 0.004 | 0.342 | 0.004   | 0.345   | 0.004   | 0.277   | 0.017         | 0.333  | 0.007  | 0.331 | 0.941       | 0.013       | 0.046       |
| 14   | 0.163 | 0.045 | 0.541 | 0.036 | 0.461 | 0.024 | 0.175   | 0.034   | 0.070   | 0.033   | 0.016*        | 0.038* | 0.026  | 0.038 | 0.182       | 0.418       | 0.401       |
| 15   | 0.032 | 0.113 | 0.043 | 0.148 | 0.013 | 0.026 | 0.010   | 0.039   | 0.014   | 0.038   | 0.033         | 0.111  | 0.014  | 0.102 | 0.904       | 0.034       | 0.062       |
| 16   | 0.185 | 0.091 | 0.506 | 0.051 | 0.425 | 0.033 | 0.143   | 0.056   | 0.059   | 0.052   | 0.026*        | 0.081* | 0.033  | 0.079 | 0.177       | 0.453       | 0.370       |
| 17   | 0.043 | 0.142 | 0.049 | 0.136 | 0.018 | 0.054 | 0.006   | 0.025   | 0.007   | 0.032   | 0.044         | 0.142  | 0.012  | 0.136 | 0.902       | 0.031       | 0.067       |
| 18   | 0.131 | 0.135 | 0.050 | 0.162 | 0.025 | 0.046 | 0.009   | 0.061   | 0.008   | 0.077   | 0.133         | 0.032  | 0.013  | 0.132 | 0.659       | 0.022       | 0.319       |
| 19   | 0.026 | 0.235 | 0.004 | 0.447 | 0.004 | 0.199 | 0.004   | 0.240   | 0.005   | 0.058   | 0.027         | 0.207  | 0.009  | 0.219 | 0.940       | 0.013       | 0.047       |
| 20   | 0.019 | 0.144 | 0.014 | 0.195 | 0.005 | 0.063 | 0.005   | 0.106   | 0.006   | 0.044   | 0.019         | 0.105  | 0.009  | 0.135 | 0.958       | 0.012       | 0.030       |

*Note.*  $g$  = guessing parameter;  $s$  = slip parameter; DINA = deterministic input, noisy "and" gate model; DINO = deterministic input, noisy "or" gate model; DINR = deterministic input, noisy ratio model; ACDM = additive cognitive diagnosis model; GDINA = generalized DINA model; DINMix = deterministic input, noisy mixed model; Wald-selected = selected mixing model via Wald test; \* = converted from the intercept and interaction parameters.

**Table S6.** The Estimated Item Parameters for the Fraction Subtraction Data (Posterior Standard Deviation).

| Item | DINA  |       | DINO  |       | DINR  |       | ACDM    |         | GDINA   |         | Wald-selected |        | DINMix |       |             |             |             |
|------|-------|-------|-------|-------|-------|-------|---------|---------|---------|---------|---------------|--------|--------|-------|-------------|-------------|-------------|
|      | $g_i$ | $s_i$ | $g_i$ | $s_i$ | $g_i$ | $s_i$ | $g_i^*$ | $s_i^*$ | $g_i^*$ | $s_i^*$ | $g_i$         | $s_i$  | $g_i$  | $s_i$ | $\tau_{i1}$ | $\tau_{i2}$ | $\tau_{i3}$ |
| 1    | 0.016 | 0.018 | 0.016 | 0.019 | 0.010 | 0.011 | 0.010   | 0.032   | 0.008   | 0.053   | 0.017*        | 0.023* | 0.016  | 0.019 | 0.065       | 0.030       | 0.073       |
| 2    | 0.015 | 0.012 | 0.017 | 0.012 | 0.017 | 0.006 | 0.012   | 0.010   | 0.013   | 0.009   | 0.016         | 0.012  | 0.015  | 0.011 | 0.053       | 0.027       | 0.054       |
| 3    | 0.007 | 0.021 | 0.010 | 0.019 | 0.005 | 0.018 | 0.005   | 0.019   | 0.005   | 0.020   | 0.007         | 0.019  | 0.007  | 0.020 | 0.027       | 0.013       | 0.025       |
| 4    | 0.026 | 0.021 | 0.025 | 0.022 | 0.027 | 0.021 | 0.025   | 0.013   | 0.048   | 0.058   | 0.034*        | 0.022* | 0.055  | 0.021 | 0.095       | 0.064       | 0.087       |
| 5    | 0.029 | 0.024 | 0.032 | 0.025 | 0.031 | 0.027 | 0.048   | 0.028   | 0.073   | 0.095   | 0.030         | 0.023  | 0.073  | 0.024 | 0.128       | 0.108       | 0.154       |
| 6    | 0.054 | 0.010 | 0.026 | 0.006 | 0.032 | 0.008 | 0.052   | 0.010   | 0.093   | 0.011   | 0.055         | 0.010  | 0.051  | 0.009 | 0           | 0           | 0           |
| 7    | 0.014 | 0.028 | 0.011 | 0.028 | 0.006 | 0.031 | 0.010   | 0.035   | 0.008   | 0.042   | 0.015         | 0.027  | 0.011  | 0.029 | 0.050       | 0.025       | 0.056       |
| 8    | 0.049 | 0.020 | 0.027 | 0.016 | 0.033 | 0.016 | 0.043   | 0.021   | 0.037   | 0.034   | 0.045         | 0.021  | 0.043  | 0.020 | 0           | 0           | 0           |
| 9    | 0.058 | 0.023 | 0.027 | 0.034 | 0.031 | 0.030 | 0.029   | 0.027   | 0.048   | 0.035   | 0.057         | 0.023  | 0.048  | 0.023 | 0           | 0           | 0           |
| 10   | 0.012 | 0.028 | 0.009 | 0.029 | 0.006 | 0.032 | 0.008   | 0.031   | 0.013   | 0.098   | 0.012         | 0.029  | 0.011  | 0.029 | 0.035       | 0.018       | 0.037       |
| 11   | 0.015 | 0.019 | 0.016 | 0.018 | 0.016 | 0.015 | 0.019   | 0.019   | 0.016   | 0.025   | 0.015         | 0.018  | 0.020  | 0.018 | 0.043       | 0.027       | 0.042       |
| 12   | 0.048 | 0.012 | 0.031 | 0.016 | 0.035 | 0.008 | 0.047   | 0.021   | 0.073   | 0.047   | 0.057*        | 0.014* | 0.033  | 0.014 | 0.091       | 0.137       | 0.185       |
| 13   | 0.008 | 0.031 | 0.005 | 0.028 | 0.004 | 0.035 | 0.004   | 0.033   | 0.004   | 0.083   | 0.009         | 0.031  | 0.007  | 0.032 | 0.031       | 0.012       | 0.031       |
| 14   | 0.039 | 0.012 | 0.029 | 0.013 | 0.033 | 0.011 | 0.048   | 0.011   | 0.042   | 0.014   | 0.015*        | 0.012* | 0.023  | 0.012 | 0.116       | 0.146       | 0.224       |
| 15   | 0.016 | 0.023 | 0.015 | 0.026 | 0.010 | 0.019 | 0.010   | 0.026   | 0.012   | 0.026   | 0.015         | 0.023  | 0.012  | 0.024 | 0.055       | 0.029       | 0.055       |
| 16   | 0.037 | 0.017 | 0.028 | 0.016 | 0.033 | 0.013 | 0.042   | 0.015   | 0.031   | 0.019   | 0.025*        | 0.016* | 0.025  | 0.016 | 0.117       | 0.153       | 0.229       |
| 17   | 0.013 | 0.022 | 0.014 | 0.022 | 0.010 | 0.022 | 0.007   | 0.023   | 0.008   | 0.032   | 0.013         | 0.023  | 0.011  | 0.023 | 0.040       | 0.022       | 0.046       |
| 18   | 0.021 | 0.023 | 0.017 | 0.024 | 0.016 | 0.026 | 0.010   | 0.041   | 0.008   | 0.077   | 0.021         | 0.028  | 0.012  | 0.023 | 0.067       | 0.021       | 0.073       |
| 19   | 0.009 | 0.032 | 0.004 | 0.029 | 0.004 | 0.041 | 0.004   | 0.039   | 0.006   | 0.075   | 0.010         | 0.032  | 0.008  | 0.033 | 0.027       | 0.012       | 0.029       |
| 20   | 0.009 | 0.026 | 0.008 | 0.026 | 0.005 | 0.029 | 0.005   | 0.034   | 0.006   | 0.057   | 0.009         | 0.025  | 0.008  | 0.026 | 0.023       | 0.010       | 0.023       |

Note,  $g$  = guessing parameter;  $s$  = slip parameter; DINA = deterministic input, noisy "and" gate model; DINO = deterministic input, noisy "or" gate model; DINR = deterministic input, noisy ratio model; ACDM = additive cognitive diagnosis model; GDINA = generalized DINA model; DINMix = deterministic input, noisy mixed model; Wald-selected = selected mixing model via Wald test; \* = converted from the intercept and interaction parameters.

**Figure S1.** Root Mean Square Error of Attribute Profile Proportions in Simulation Study 2.

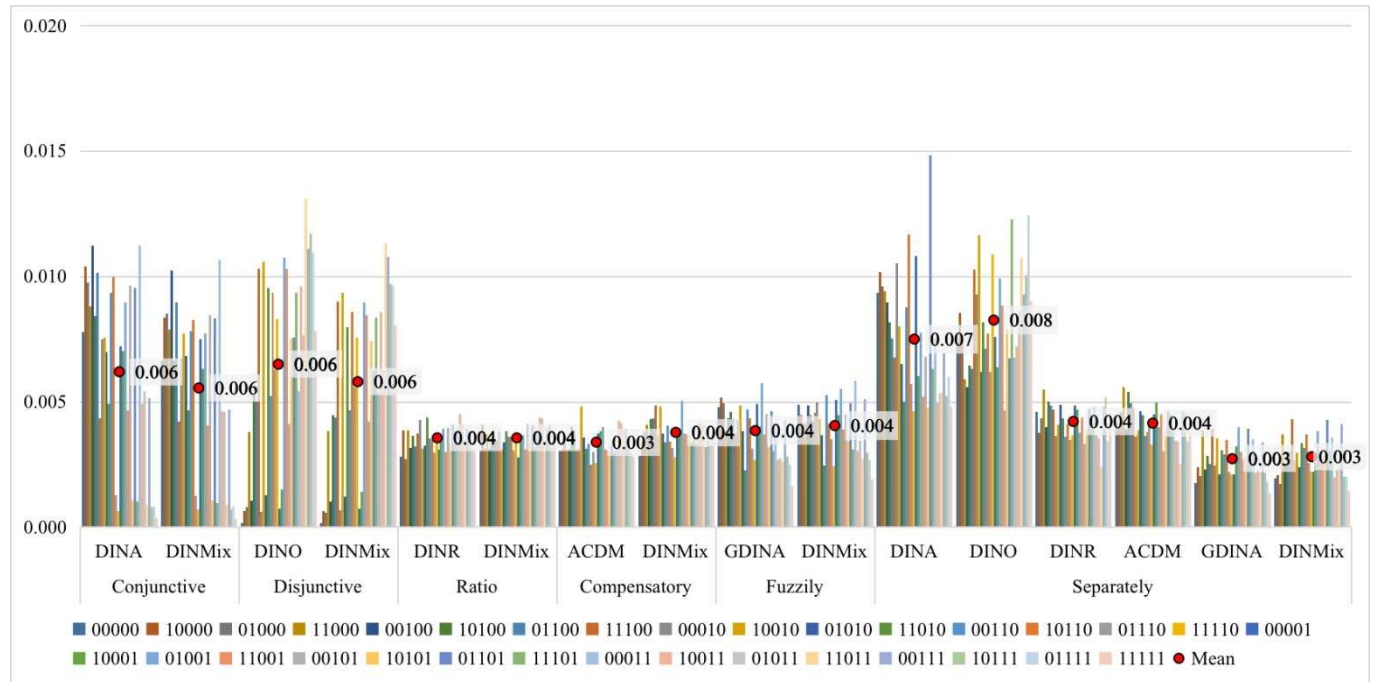

Note. DINA = deterministic input, noisy "and" gate model; DINO = deterministic input, noisy "or" gate model; DINR = deterministic input, noisy ratio model; ACDM = additive cognitive diagnosis model; GDINA = generalized DINA model; DINMix = deterministic input, noisy mixed model; Mean = mean root mean square error of 32 attribute profile proportions.
